# Supplementary material for: TRADD regulates perinatal development and adulthood survival in mice lacking RIPK1 and RIPK3
Source: PubMed Central journal article supplement (PMC6370879; doi:10.1038/s41467-019-08584-5), 2019-02-11
Supplement: 41467_2019_8584_MOESM2_ESM.pdf [file 41467_2019_8584_MOESM2_ESM.pdf]

# Supplementary Information

**TRADD regulates perinatal development and  
adulthood survival in mice lacking RIPK1 and RIPK3**

Dowling et al.

# Supplementary Figure 1

## a Offspring of $Fadd^{+/-} Tnf\alpha^{-/-}$ intercrosses

| Genotype              | <i>Fadd</i> | +/+ | +/- | -/-       | Total |
|-----------------------|-------------|-----|-----|-----------|-------|
|                       | <i>Tnfα</i> | -/- | -/- | -/-       |       |
| E12.5-16.5<br>Embryos | Actual      | 13  | 23  | <b>15</b> | 51    |
|                       | Expected    | 13  | 26  | 13        | 52    |
| E17.5-18.5<br>Embryos | Actual      | 20  | 40  | <b>25</b> | 85    |
|                       | Expected    | 20  | 40  | 20        | 80    |
| After Birth           | Actual      | 21  | 23  | <b>0</b>  | 44    |
|                       | Expected    | 21  | 42  | 21        | 84    |

## b E18.5

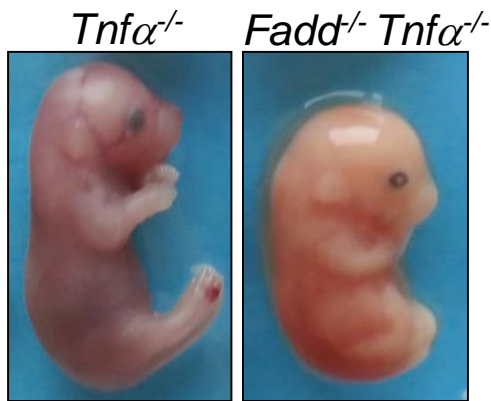

## c Offspring of $Fadd^{+/-} Tnf\alpha^{+/-}$ intercrosses

| Genotype   | <i>Fadd</i> | +/+, +/-      | -/-      | -/-      | Total |
|------------|-------------|---------------|----------|----------|-------|
|            | <i>Tnfα</i> | +/+, +/-, -/- | +/+, +/- | -/-      |       |
| E17.5-18.5 | Actual      | 25            | <b>0</b> | <b>3</b> | 28    |
| Embryos    | Expected    | 25            | 6        | 2        | 33    |

**Supplementary Figure 1. Deletion of TNF $\alpha$  improves  $Fadd^{-/-}$  embryogenesis** **a**, Actual and expected frequencies of embryos of various embryonic stages from intercrosses of  $Fadd^{+/-} Tnf\alpha^{-/-}$  mice. Chi square analysis shows no significant difference between actual and expected frequencies at E12.5-E16.5 ( $p = 0.721$ ) or E17.5-E18.5 ( $p = 0.535$ ), but there is a significant difference after birth ( $p < 0.0001$ ). **b**, Embryos with indicated genotypes at E18.5, ( $n = 3$  independent experiments). **c**, Actual and expected frequencies of embryos from  $Fadd^{+/-} Tnf\alpha^{+/-}$  intercrosses. Chi square analysis shows a significant difference at late embryonic stages ( $p = 0.0388$ ).

## Supplementary Figure 2

### a Offspring of *Fadd*<sup>+/-</sup> *Tradd*<sup>-/-</sup> intercrosses

| Genotype   | <i>Fadd</i><br><i>Tradd</i> | +/+<br>-/- | +/-<br>-/- | -/-<br>-/- | Total |
|------------|-----------------------------|------------|------------|------------|-------|
| E12.5      | Actual                      | 8          | 21         | <b>2</b>   | 31    |
| Embryos    | Expected                    | 8          | 16         | 8          | 32    |
| E13.5-18.5 | Actual                      | 27         | 55         | <b>0</b>   | 82    |
| Embryos    | Expected                    | 27         | 54         | 27         | 108   |

### b

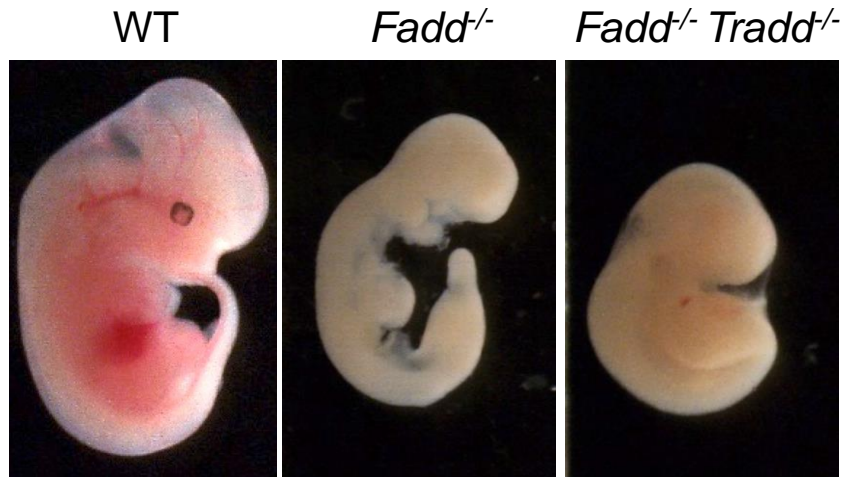

**Supplementary Figure 2. TRADD does not mediate necroptosis in *Fadd*<sup>-/-</sup> embryos** **a**, Actual and expected frequencies of embryos of various embryonic stages from intercrosses of *Fadd*<sup>+/-</sup>*Tradd*<sup>-/-</sup> mice. Chi square analysis shows a significant difference between actual and expected frequencies at E12.5 ( $p = 0.048$ ) and E13.5-18.5 ( $p < 0.0001$ ). **b**, Embryos with indicated genotypes at E12.5 (n = 3 independent experiments).

## Supplementary Figure 3

### a Offspring of *Ripk1*<sup>+/-</sup> *Fadd*<sup>+/-</sup> *Tradd*<sup>+/-</sup> intercrosses

| Genotype              | <i>Ripk1</i> | +/, +/- | +/, +/- | -/-     | -/- | Total |
|-----------------------|--------------|---------|---------|---------|-----|-------|
|                       | <i>Fadd</i>  | +/, +/- | -/-     | +/, +/- | -/- |       |
|                       | <i>Tradd</i> | -/-     | -/-     | -/-     | -/- |       |
| At birth              | Actual       | 93      | 0       | 4       | 3   | 100   |
|                       | Expected     | 93      | 31      | 31      | 10  | 165   |
| At weaning age (3 wk) | Actual       | 89      | 0       | 0       | 0   | 89    |
|                       | Expected     | 90      | 30      | 30      | 10  | 160   |

**b**

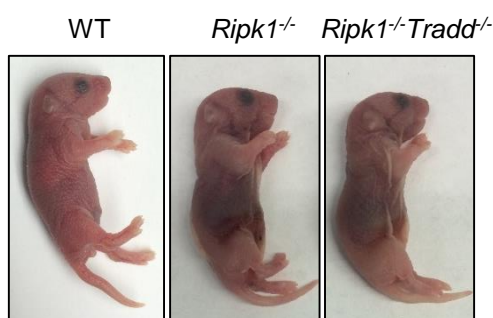

**c**

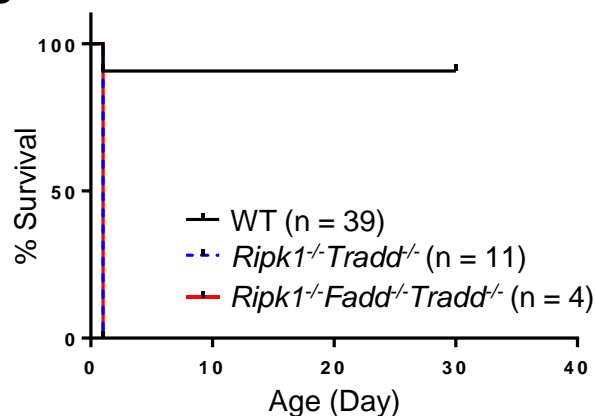

**Supplementary Figure 3. Deletion of TRADD does not rescue perinatal lethality of *Ripk1*<sup>-/-</sup> or *Ripk1*<sup>-/-</sup>*Fadd*<sup>-/-</sup> mice** **a**, Actual and expected frequency of indicated genotypes at birth and weaning age from intercross of *Ripk1*<sup>+/-</sup>*Fadd*<sup>+/-</sup>*Tradd*<sup>+/-</sup> mice. Chi square analysis shows a significant difference between actual and expected frequencies ( $p < 0.0001$ ). **b**, Newborn mice of indicated genotypes (n = 4 independent experiments). **c**, Kaplan-Meier plot showing survival of mice of indicated genotypes. Logrank test shows no significant difference in survival between *Ripk1*<sup>-/-</sup>*Fadd*<sup>-/-</sup>*Tradd*<sup>-/-</sup> and *Ripk1*<sup>-/-</sup>*Tradd*<sup>-/-</sup> mice ( $p > 0.999$ ).

# Supplementary Figure 4

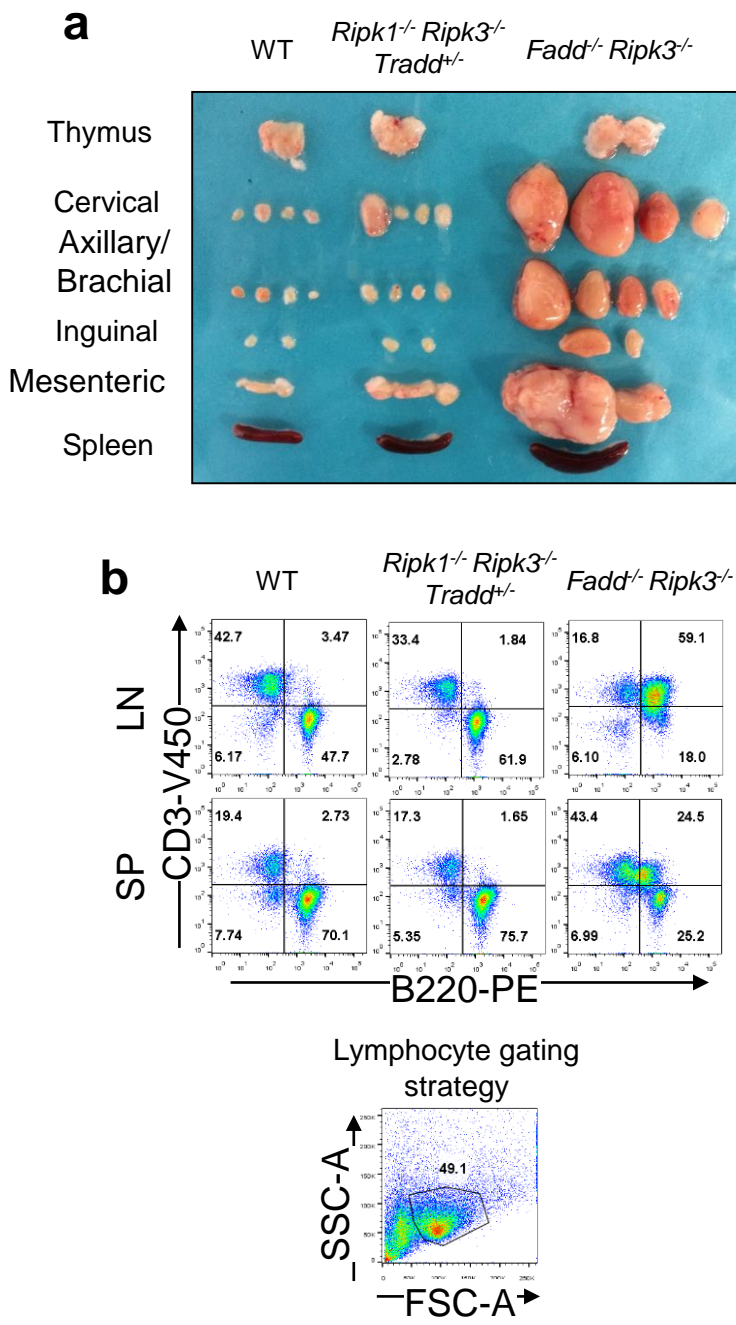

**Supplementary Figure 4. Analysis of aged *Ripk1*<sup>-/-</sup>*Ripk3*<sup>-/-</sup>*Tradd*<sup>+/-</sup> mice** **a**, Spleen, lymph nodes, and thymus of 9 month old mice of indicated genotypes (n = 4 independent experiments). **b**, Two-color flow cytometric plots investigating the presence of T cells (CD3<sup>+</sup>B220<sup>-</sup>) and B cells (CD3<sup>-</sup>B220<sup>+</sup>) and abnormal T cells (CD3<sup>+</sup>B220<sup>+</sup>) in the lymph nodes and spleen of aged mice (n = 4 independent experiments)

# Supplementary Figure 5

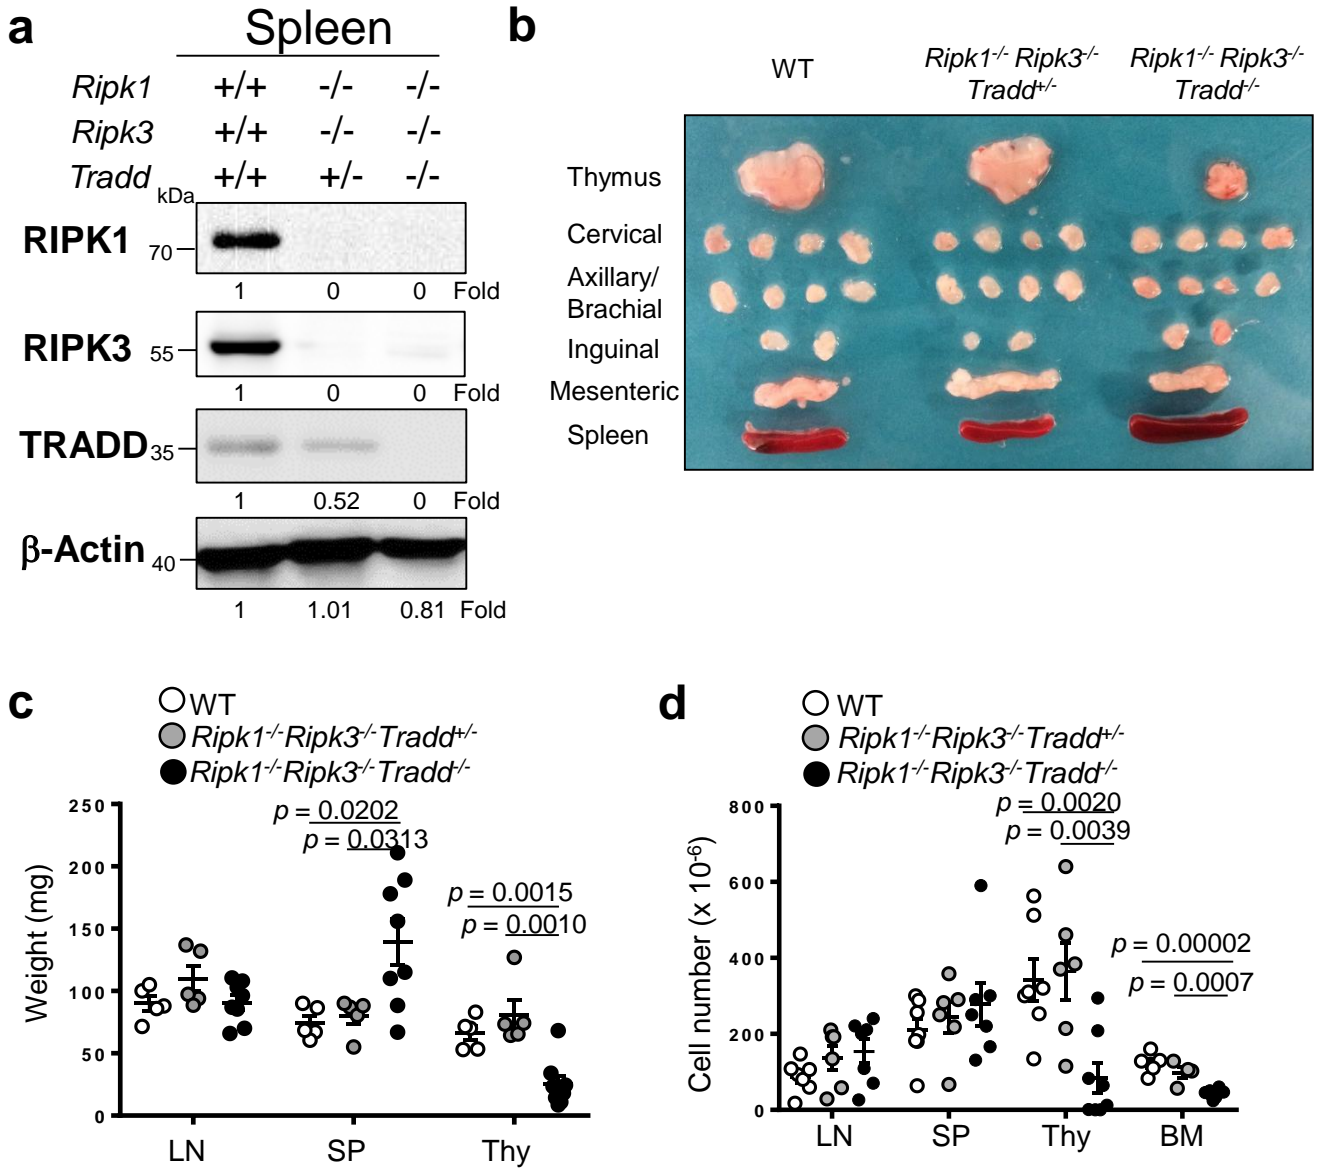

**Supplementary Figure 5. Lymphoid compartment of *Ripk1*<sup>-/-</sup>*Ripk3*<sup>-/-</sup>*Tradd*<sup>-/-</sup> mice** **a**, Western blots showing RIPK1, RIPK3, TRADD, and  $\beta$ -Actin protein concentrations in the spleen ( $n = 3$  independent experiments). **b**, Spleen, lymph nodes, and thymus of 7 week old mice of indicated genotypes ( $n = 5$  independent experiments). **c**, Weight of lymph nodes, spleen, and thymus of 7-8 week old mice ( $n = 6$  independent experiments). **d**, Total cellularity of lymphoid organs of 7-8 week old mice ( $n = 6$  independent experiments). Errors in **c** and **d** represent mean $\pm$ SEM.

# Supplementary Figure 6

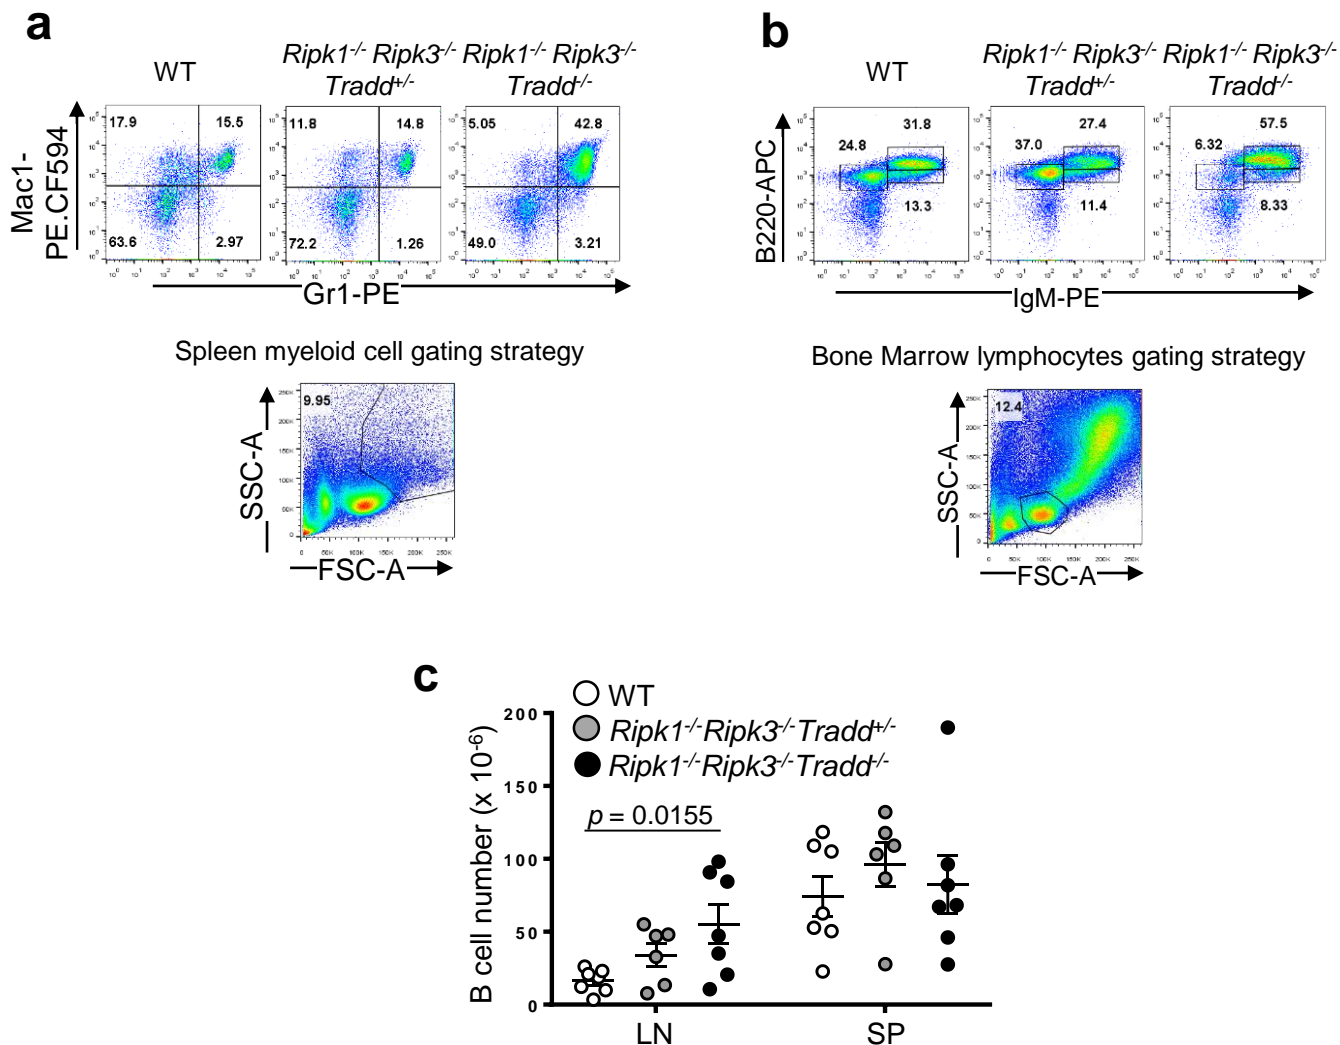

**Supplementary Figure 6. Myeloid cells and B cell in *Ripk1*<sup>-/-</sup>*Ripk3*<sup>-/-</sup>*Tradd*<sup>-/-</sup> mice** **a**, Myeloid populations in the spleen identified by Mac-1 and Gr-1 staining (n = 4 independent experiments). **b**, Representative 2-color flow cytometric plots showing B220<sup>+</sup>IgM<sup>-</sup> pre/pro B cells, B220<sup>+</sup>IgM<sup>+</sup> immature B cells, and B220<sup>hi</sup>IgM<sup>+</sup> mature B cells in the bone marrow (n = 4 independent experiments). **c**, B220<sup>+</sup> B cell numbers in the lymph nodes and spleen (n = 7 independent experiments). All graphs presented as mean  $\pm$  SEM.

# Supplementary Figure 7

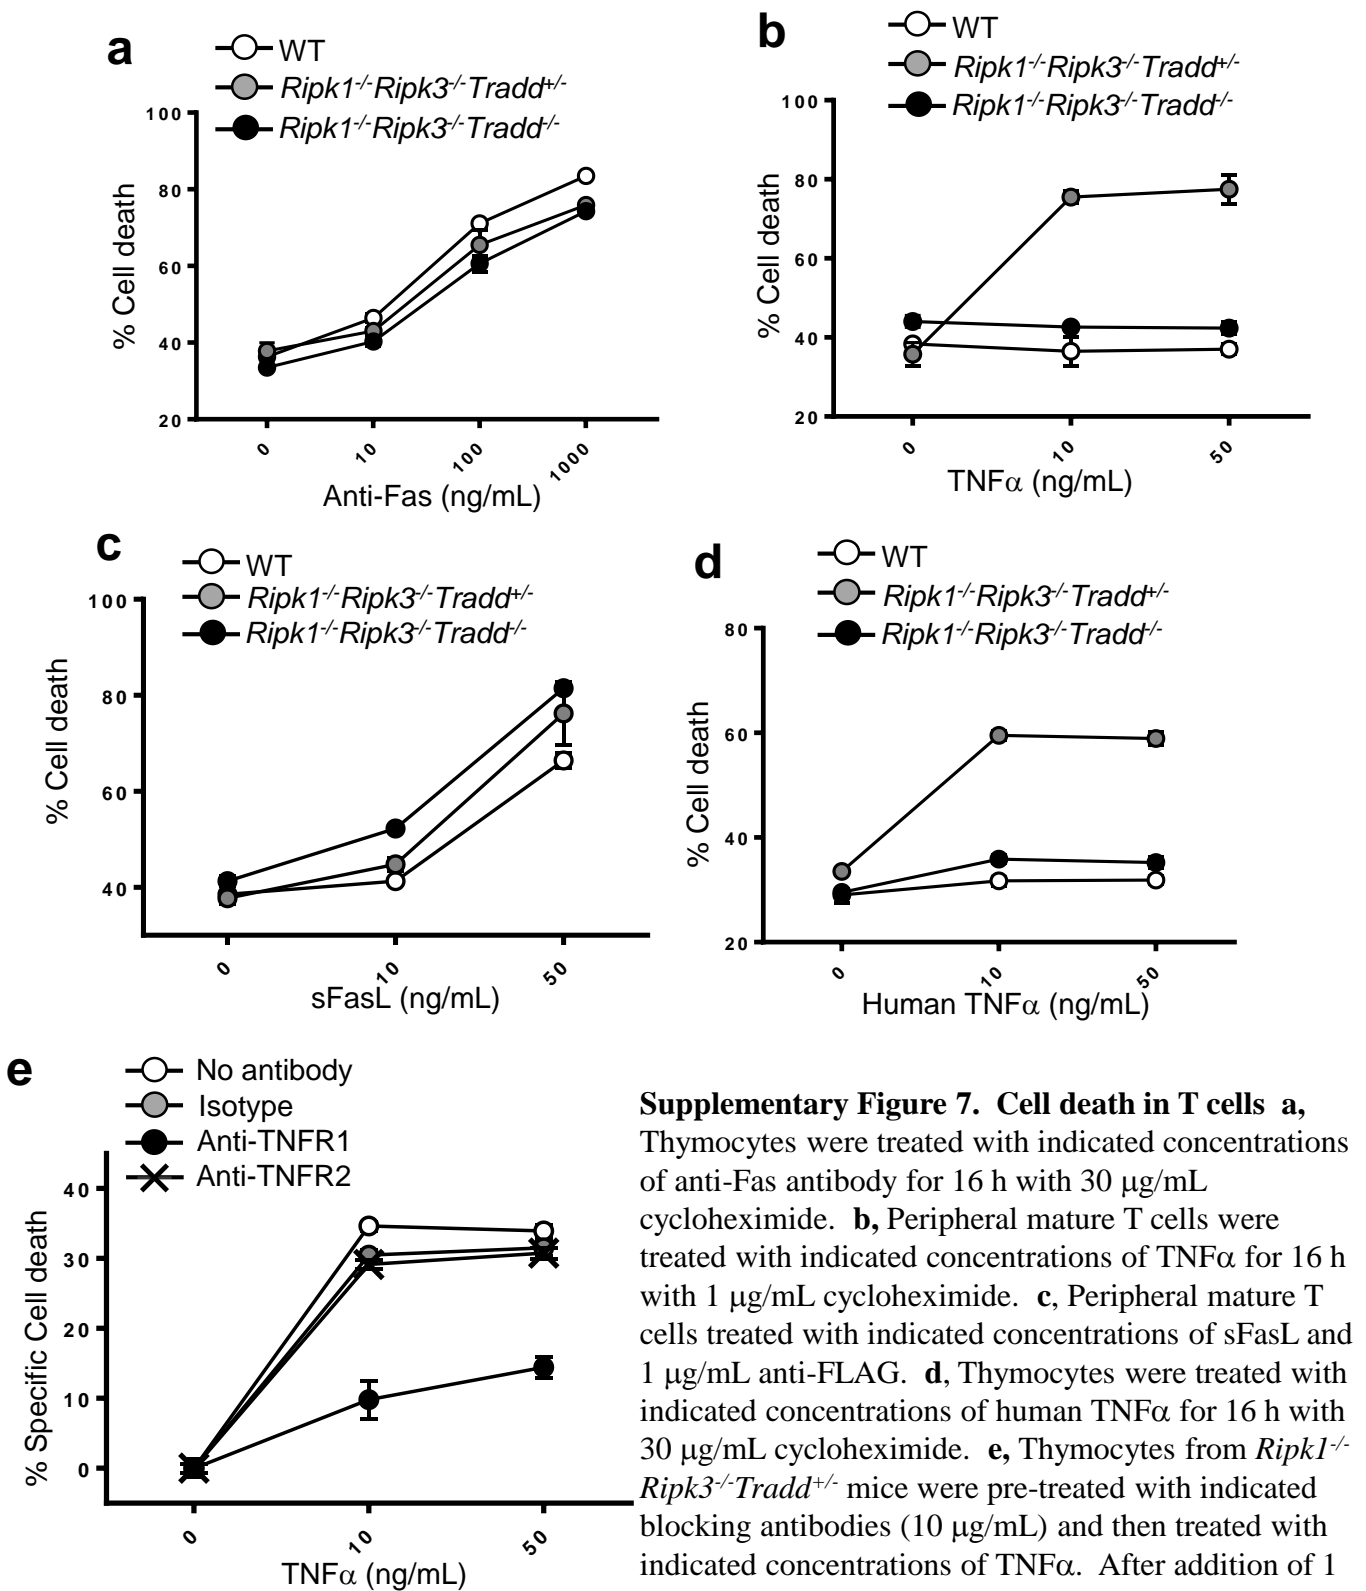

**Supplementary Figure 7. Cell death in T cells** **a**, Thymocytes were treated with indicated concentrations of anti-Fas antibody for 16 h with 30  $\mu$ g/mL cycloheximide. **b**, Peripheral mature T cells were treated with indicated concentrations of TNF $\alpha$  for 16 h with 1  $\mu$ g/mL cycloheximide. **c**, Peripheral mature T cells treated with indicated concentrations of sFasL and 1  $\mu$ g/mL anti-FLAG. **d**, Thymocytes were treated with indicated concentrations of human TNF $\alpha$  for 16 h with 30  $\mu$ g/mL cycloheximide. **e**, Thymocytes from *Ripk1<sup>-/-</sup>Ripk3<sup>-/-</sup>Tradd<sup>+/-</sup>* mice were pre-treated with indicated blocking antibodies (10  $\mu$ g/mL) and then treated with indicated concentrations of TNF $\alpha$ . After addition of 1  $\mu$ g/mL propidium iodide (PI), dead cells (PI<sup>+</sup>) were determined by flow cytometry. Errors,  $\pm$ SEM of triplicates. Data represent three independent experiments.



# Supplementary Figure 8

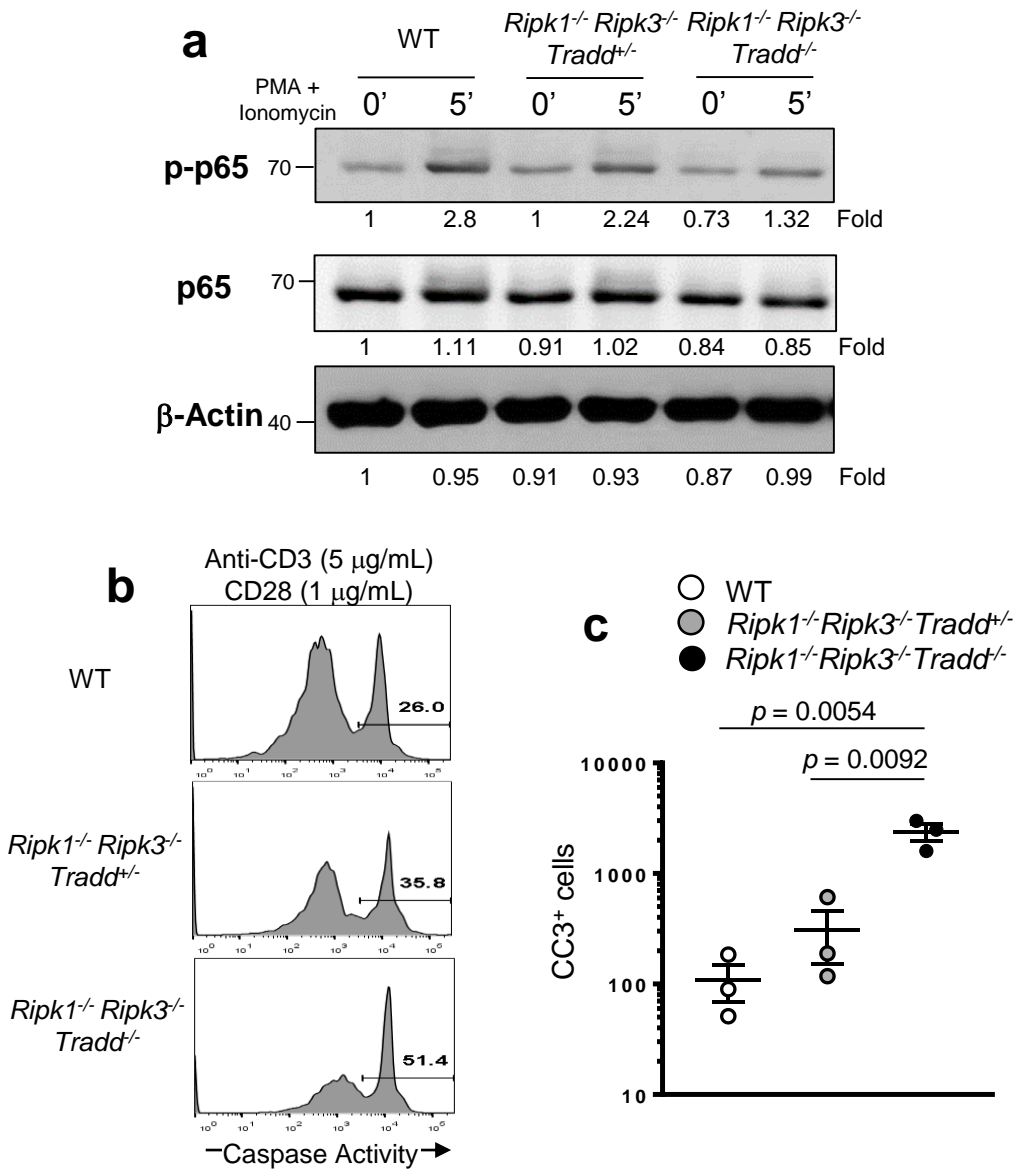

**Supplementary Figure 8. NFκB signaling and caspase activity analysis** **a**, Western blot analysis of NFκB p65 phosphorylation, total p65, after stimulation of peripheral mature T cells. The data represents three independent experiments. β-Actin, loading control. **b**, Caspase activities of mature T cells after 48 h stimulation was measured by flow cytometry with CellEvent Caspase 3/7 Green Flow Reagent. **c**, Scattered dot plot showing quantification of CC3<sup>+</sup> cells in the large intestine sections using the ImageScope software (Leica Biosystems). Errors, mean±SEM, n = 3.

# Supplementary Figure 9

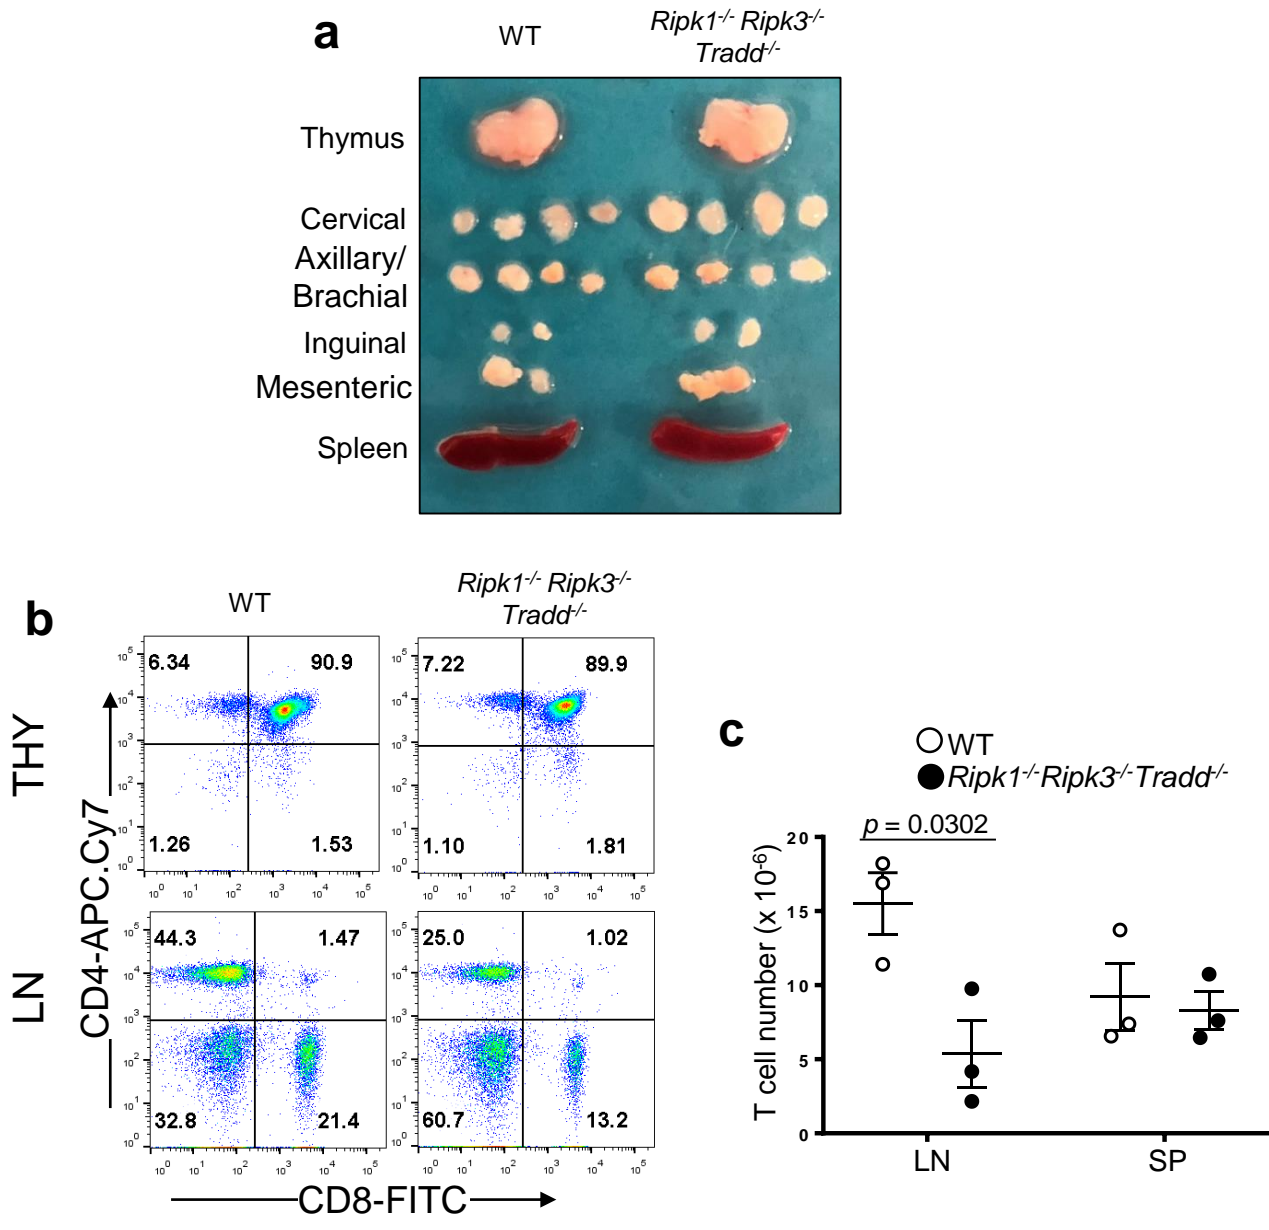

**Supplementary Figure 9. Analysis of weaning age *Ripk1*<sup>-/-</sup>*Ripk3*<sup>-/-</sup>*Tradd*<sup>-/-</sup> mice** **a**, The spleen, lymph nodes, and thymus of 3 week old mice of indicated genotypes. Data are representative of at least three mice of each genotype. **b** Two-color flow cytometric plots showing CD4<sup>+</sup> and CD8<sup>+</sup> populations in the thymus and lymph nodes of three week old mice (representative of three independent experiments). **c**, CD3<sup>+</sup> T cell numbers in the lymphoid organs of three week old mice of indicated genotypes (n = 3 independent experiments). Errors, mean ± SEM.

# Supplementary Figure 10

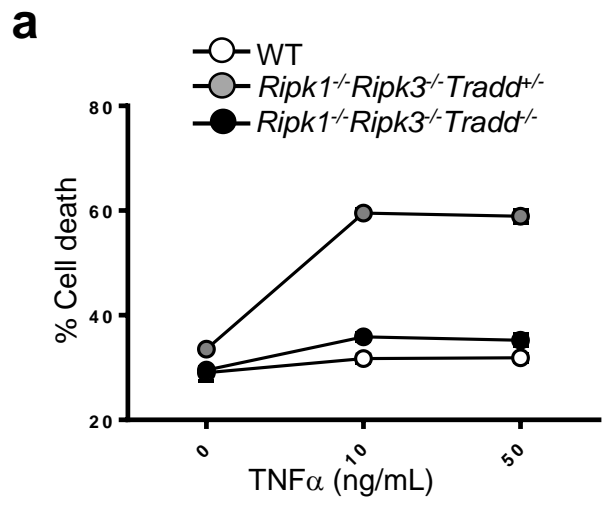

**Supplementary Figure 10. Cell death in thymocytes from young mice a,** Thymocytes isolated from 3 week old mice were treated with indicated concentrations of TNFα for 16 h with 30 μg/mL cycloheximide. Cell death analysis was performed by PI staining using a flow cytometer. Data represents three independent experiments. Errors, ± SEM.

# Supplementary Figure 11

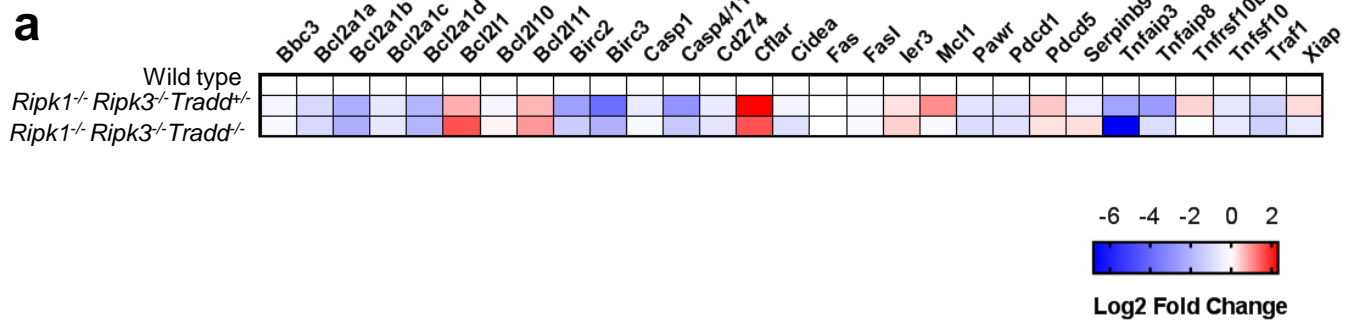

**b**

|                  | WT    | <i>Ripk1</i> <sup>-/-</sup> <i>Ripk3</i> <sup>-/-</sup><br><i>Tradd</i> <sup>+/-</sup> | <i>Ripk1</i> <sup>-/-</sup> <i>Ripk3</i> <sup>-/-</sup><br><i>Tradd</i> <sup>-/-</sup> |
|------------------|-------|----------------------------------------------------------------------------------------|----------------------------------------------------------------------------------------|
| <b>Bbc3</b>      | 5.08  | 4.79                                                                                   | 4.89                                                                                   |
| <b>Bcl2a1a</b>   | 5.69  | 4.66                                                                                   | 4.66                                                                                   |
| <b>Bcl2a1b</b>   | 6.66  | 4.47                                                                                   | 4.47                                                                                   |
| <b>Bcl2a1c</b>   | 4.01  | 3.35                                                                                   | 3.35                                                                                   |
| <b>Bcl2a1d</b>   | 6.44  | 4.42                                                                                   | 4.46                                                                                   |
| <b>Bcl2l1</b>    | 11.36 | 12.1                                                                                   | 12.91                                                                                  |
| <b>Bcl2l10</b>   | 3.8   | 3.51                                                                                   | 3.89                                                                                   |
| <b>Bcl2l11</b>   | 4.8   | 5.47                                                                                   | 5.72                                                                                   |
| <b>Birc2</b>     | 9.8   | 7.21                                                                                   | 8.41                                                                                   |
| <b>Birc3</b>     | 11.34 | 7.43                                                                                   | 9.21                                                                                   |
| <b>Casp1</b>     | 4.99  | 4.42                                                                                   | 4.78                                                                                   |
| <b>Casp4/11</b>  | 7.86  | 4.96                                                                                   | 6.41                                                                                   |
| <b>Cd274</b>     | 5.12  | 4.55                                                                                   | 4.39                                                                                   |
| <b>Cflar</b>     | 8.66  | 10.97                                                                                  | 10.21                                                                                  |
| <b>Cidea</b>     | 4.65  | 4.32                                                                                   | 3.78                                                                                   |
| <b>Fas</b>       | 6.73  | 6.73                                                                                   | 6.73                                                                                   |
| <b>Fasl</b>      | 3.3   | 3.1                                                                                    | 3.1                                                                                    |
| <b>Ier3</b>      | 11.5  | 11.77                                                                                  | 11.92                                                                                  |
| <b>Mcl1</b>      | 11.87 | 12.91                                                                                  | 11.7                                                                                   |
| <b>Pawr</b>      | 8.67  | 7.9                                                                                    | 7.73                                                                                   |
| <b>Pdcd1</b>     | 4.36  | 3.54                                                                                   | 3.54                                                                                   |
| <b>Pdcd5</b>     | 11.71 | 12.21                                                                                  | 11.97                                                                                  |
| <b>Serpinb9</b>  | 11.25 | 10.76                                                                                  | 11.54                                                                                  |
| <b>Tnfaip3</b>   | 13.27 | 10.77                                                                                  | 6.45                                                                                   |
| <b>Tnfaip8</b>   | 8.14  | 5.45                                                                                   | 7.21                                                                                   |
| <b>Tnfrsf10b</b> | 11.77 | 12.16                                                                                  | 11.77                                                                                  |
| <b>Tnfsf10</b>   | 3.79  | 3.1                                                                                    | 3.16                                                                                   |
| <b>Traf1</b>     | 6.38  | 5.15                                                                                   | 5.14                                                                                   |
| <b>Xiap</b>      | 11.39 | 11.72                                                                                  | 10.79                                                                                  |

**Supplementary Figure 11. NFκB target gene expression** **a**, Heatmap of RNA expression analysis from dermal fibroblasts stimulated with 10 ng/mL TNFα for 4 h. Data expressed as fold change relative to wild type mouse fibroblasts. **b**, Gene expression levels of the array analysis are shown Log2 signal intensity.
